# Supplementary material for: An adhesion G protein-coupled receptor is required in cartilaginous and dense connective tissues to maintain spine alignment
Source: eLife. 2021 Jul 28;10:e67781. doi: 10.7554/eLife.67781 (PMC8328515; doi:10.7554/eLife.67781)
Supplement: Figure 2—source data 1. [file elife-67781-fig2-data1.xlsx]

## Sheet: Fig. 2I
cob angle	genotype
age	Cre- Control																														Cre+ Control
P20	4.8	0	7.6	7.2	6.1	2.5	0	4.3	2.5	4.7	9.9	0	2.6	0	0	0	0	0	6.7	3.1	6.6	4	2.9	5.9	7.2	6.9	3.1	0	0		0	8.6	6.2	0	2.5	2.2	6	7.1	0	0	0	0	5.6	0	0	7.7	0	3.9
P40	3.1	6.8	0	0	0	0	8.2	3.9	7.7	4.7	5.5	4.2	1.7	6.1	2.4	0	3.5	0	4.6	5.6	7.2	7	2	7.8	9	6.2	1.2	8.3	2.7		6.3	8.2	7.1	0	0	7.6		7.7	5.5	0	0	8.2	6.3	6.3	5.5	3.6	7	5.5
P120	0	4.7	8.7	0	3.9	4.7	6.7	0	1.1	8.6	2	6	4.5	4.6	7.1	8.9	7.1	0	0	0	8.4	0	5.4	6.8	0	0	0	4.3	8.6		5.6	4.6	5.9	0	8.5	13.8	0	6.3	3.3	3.7	8.5	5.9	3	7.2	6.9	0	0	0
Table Analyzed	P20 40 120 three groups
Mixed-effects model (REML)	Matching: Stacked
Assume sphericity?	No
Alpha	0.05
Fixed effects (type III)	P value	P value summary	Statistically significant (P < 0.05)?	F (DFn, DFd)	Geisser-Greenhouse's epsilon
Time	0.0957	ns	No	F (1.664, 105.7) = 2.511	0.832
genotype	<0.0001	****	Yes	F (2, 67) = 26.78
Time x genotype	0.9148	ns	No	F (4, 127) = 0.2408
Random effects	SD	Variance
cobb angle	5.763	33.21
Residual	4.239	17.97
Was the matching effective?
Chi-square, df	70.83, 1
P value	<0.0001
P value summary	****
Is there significant matching (P < 0.05)?	Yes
Data summary
Number of columns (genotype)	3
Number of rows (Time)	3
Number of subjects (cobb angle)	70
Number of missing values	7
Within each row, compare columns (simple effects within rows)
Number of families	3
Number of comparisons per family	3
Alpha	0.05
Tukey's multiple comparisons test	Mean Diff.	95.00% CI of diff.	Significant?	Summary	Adjusted P Value
P20
Cre- Control vs. Cre+ Control	0.6333	-1.690 to 2.957	No	ns	0.7838
Cre- Control vs. Col2Cre; Adgrg6	-11.21	-17.08 to -5.340	Yes	***	0.0002
Cre+ Control vs. Col2Cre; Adgrg6	-11.84	-17.82 to -5.864	Yes	***	0.0001
P40
Cre- Control vs. Cre+ Control	-0.871	-3.149 to 1.407	No	ns	0.6202
Cre- Control vs. Col2Cre; Adgrg6	-12.28	-18.87 to -5.687	Yes	***	0.0003
Cre+ Control vs. Col2Cre; Adgrg6	-11.41	-18.09 to -4.726	Yes	***	0.0007
P120
Cre- Control vs. Cre+ Control	-0.7567	-3.442 to 1.928	No	ns	0.7701
Cre- Control vs. Col2Cre; Adgrg6	-10.61	-17.85 to -3.363	Yes	**	0.0041
Cre+ Control vs. Col2Cre; Adgrg6	-9.848	-17.21 to -2.482	Yes	**	0.0081
Test details	Mean 1	Mean 2	Mean Diff.	SE of diff.	N1
P20
Cre- Control vs. Cre+ Control	3.4	2.767	0.6333	0.9489	29
Cre- Control vs. Col2Cre; Adgrg6	3.4	14.61	-11.21	2.354	29
Cre+ Control vs. Col2Cre; Adgrg6	2.767	14.61	-11.84	2.41	18
P40
Cre- Control vs. Cre+ Control	4.117	4.988	-0.871	0.928	29
Cre- Control vs. Col2Cre; Adgrg6	4.117	16.4	-12.28	2.64	29
Cre+ Control vs. Col2Cre; Adgrg6	4.988	16.4	-11.41	2.686	17
P120
Cre- Control vs. Cre+ Control	3.866	4.622	-0.7567	1.094	29
Cre- Control vs. Col2Cre; Adgrg6	3.866	14.47	-10.61	2.833	29
Cre+ Control vs. Col2Cre; Adgrg6	4.622	14.47	-9.848	2.904	18

## Sheet: Fig. 2J
		age
	number of mice	P20	P40	P120
	T1	0	0	0
	T2	0	0	0
	T3	0	0	0
	T4	0	0	0
	T5	0	0	0
	T6	0	1	1
	T7	1	1	1
	T8	3	3	1
	T9	4	4	2
	T10	1	1	0
	T11	2	1	2
	T12	0	2	1
	T13	0	1	1

## Sheet: Fig. 2K
cobb angle	Cre- control
age	P20	P40	P120
	4.8	3.1	0
	0	-6.8	4.7
	-7.6	0	-8.7
	7.2	0	0
	-6.1	0	3.9
	2.5	0	4.7
	0	-8.2	-6.7
	4.3	3.9	0
	2.5	7.7	-1.1
	-4.7	4.7	8.6
	-9.9	-5.5	2
	0	4.2	6
	-2.6	-1.7	4.5
	0	6.1	4.6
	0	2.4	-7.1
	0	0	8.9
	0	-3.5	7.1
	0	0	0
	6.7	4.6	0
	3.1	5.6	0
	-6.6	-7.2	8.4
	4	7	0
	-2.9	2	5.4
	5.9	7.8	6.8
	7.2	-9	0
	-6.9	6.2	0
	-3.1	-1.2	NA
	0	8.3	4.3
	0	2.7	8.6

## Sheet: Fig.2L
Cobb angle	Col2a1Cre; Adgrg6f/f
age	P20	P40	P120
	4.9	10.6	11.3
	-3.5	0	-7.9
	-25.4	-45.9	NA
	3.9	0	9.2
	-19.9	-25	-26.8
	9.1	7.6	6.3
	0	-8.2	2.6
	18.2	14.8	NA
	21.4	25.5	36
	-19.9	-20.4	-4.9
	3.8	13.6	15.3
	-39.2	-25.5	-18.8
	-19.3	-20.1	NA
	17.3	19.6	NA
	-5	0	NA
	-15.3	-21.1	-35
	-4	7.2	-2.8
	-32.4	-33.1	-32.4
	7.3	7.8	12.7
	-3	0.7	2.1
	-23.4	-24.7	-11.2
	30.9	36.4	NA
	-8.9	-9.3	-10.7
