# Supplementary material for: An adhesion G protein-coupled receptor is required in cartilaginous and dense connective tissues to maintain spine alignment
Source: eLife. 2021 Jul 28;10:e67781. doi: 10.7554/eLife.67781 (PMC8328515; doi:10.7554/eLife.67781)
Supplement: Figure 3—source data 1. [file elife-67781-fig3-data1.xlsx]

## Sheet: Fig. 2G
		Sox9 IHC P20
		Control							Col2a1Cre; Adgrg6
		Sox9 +	Sox9 -	Sox9+%	ave				Sox9 +	Sox9 -	Sox9+%	ave
AF	c1	54	61	0.469565	0.435675		curved	m1	82	164	0.333333	0.402848
		45	67	0.401786					94	105	0.472362
	c2	72	80	0.473684	0.504828			m2	21	272	0.0716724	0.0927467
		149	129	0.535971					28	218	0.113821
	c3	39	144	0.213115	0.199254			m3	6	187	0.0310881	0.030425
		33	145	0.185393					5	163	0.0297619
	c4	80	59	0.57554	0.555982		not curved	m4	88	140	0.385965	0.265852
		81	70	0.536424					65	381	0.14574
	c5	133	41	0.764368	0.794684			m5	64	260	0.197531	0.143351
		99	21	0.825					28	286	0.089172
	c6	80	22	0.784314	0.80538			m6	66	164	0.286957	0.395416
		100	21	0.826446					65	64	0.503876
Table Analyzed	AF
Column B	Col2Cre; Adgrg6
vs.	vs.
Column A	Control
Unpaired t test
P value	0.0163
P value summary	*
Significantly different (P < 0.05)?	Yes
One- or two-tailed P value?	Two-tailed
t, df	t=2.882, df=10
How big is the difference?
Mean of column A	54.93
Mean of column B	22.18
Difference between means (B - A) ± SEM	-32.75 ± 11.37
95% confidence interval	-58.08 to -7.428
R squared (eta squared)	0.4537
F test to compare variances
F, DFn, Dfd	2.118, 5, 5
P value	0.4297
P value summary	ns
Significantly different (P < 0.05)?	No
Data analyzed
Sample size, column A	6
Sample size, column B	6
		Sox9 +	Sox9 -	Sox9+%	ave				Sox9 +	Sox9 -	Sox9+%	ave
NP	c1	102	2	0.980769	0.984829		curved	m1	74	138	0.349057	0.441195
		89	1	0.988889					80	70	0.533333
	c2	156	5	0.968944	0.980976			m2	56	35	0.615385	0.543229
		142	1	0.993007					57	64	0.471074
	c3	96	32	0.75	0.769231			m3	30	129	0.188679	0.11434
		82	22	0.788462					8	192	0.04
	c4	93	76	0.550296	0.673882		not curved	m4	60	86	0.410959	0.319859
		63	16	0.797468					35	118	0.228758
	c5	69	9	0.884615	0.845922			m5	72	99	0.421053	0.252951
		67	16	0.807229					14	151	0.0848485
	c6	88	1	0.988764	0.968066			m6	110	58	0.654762	0.707609
		72	4	0.947368					200	63	0.760456
Table Analyzed	NP
Column B	Col2Cre; Adgrg6
vs.	vs.
Column A	Control
Unpaired t test
P value	0.0009
P value summary	***
Significantly different (P < 0.05)?	Yes
One- or two-tailed P value?	Two-tailed
t, df	t=4.657, df=10
How big is the difference?
Mean of column A	87.05
Mean of column B	39.65
Difference between means (B - A) ± SEM	-47.40 ± 10.18
95% confidence interval	-70.07 to -24.72
R squared (eta squared)	0.6844
F test to compare variances
F, DFn, Dfd	2.685, 5, 5
P value	0.3022
P value summary	ns
Significantly different (P < 0.05)?	No
Data analyzed
Sample size, column A	6
Sample size, column B	6
		Sox9 +	Sox9 -	Sox9+%	ave				Sox9 +	Sox9 -	Sox9+%	ave
EP	c1	194	95	0.67128	0.704624		curved	m1	137	176	0.4377	0.429027
		138	49	0.737968					95	131	0.420354
	c2	339	151	0.691837	0.705588			m2	84	232	0.265823	0.248171
		305	119	0.71934					71	237	0.230519
	c3	204	144	0.586207	0.514353			m3	22	333	0.0619718	0.0558615
		177	223	0.4425					20	382	0.0497512
	c4	136	59	0.697436	0.693546		not curved	m4	111	213	0.342593	0.383686
		140	63	0.689655					144	195	0.424779
	c5	127	24	0.84106	0.83626			m5	118	256	0.315508	0.320771
		148	30	0.831461					134	277	0.326034
	c6	141	35	0.801136	0.806682			m6	115	62	0.649718	0.548785
		186	43	0.812227					73	90	0.447853
Table Analyzed	EP
Column B	Col2Cre; Adgrg6
vs.	vs.
Column A	Control
Unpaired t test
P value	0.001
P value summary	**
Significantly different (P < 0.05)?	Yes
One- or two-tailed P value?	Two-tailed
t, df	t=4.571, df=10
How big is the difference?
Mean of column A	71.02
Mean of column B	33.11
Difference between means (B - A) ± SEM	-37.91 ± 8.294
95% confidence interval	-56.39 to -19.43
R squared (eta squared)	0.6763
F test to compare variances
F, DFn, Dfd	2.230, 5, 5
P value	0.3993
P value summary	ns
Significantly different (P < 0.05)?	No
Data analyzed
Sample size, column A	6
Sample size, column B	6
		Sox9 +	Sox9 -	Sox9+%	ave				Sox9 +	Sox9 -	Sox9+%	ave
GP	c1	122	76	0.616162	0.587086		curved	m1	39	213	0.154762	0.134468
		101	80	0.558011					29	225	0.114173
	c2	202	94	0.682432	0.688378			m2	135	248	0.35248	0.314114
		318	140	0.694323					83	218	0.275748
	c3	100	341	0.226757	0.231913			m3	58	344	0.144279	0.128162
		55	177	0.237069					40	317	0.112045
	c4	28	142	0.164706	0.153419		not curved	m4	60	436	0.120968	0.169526
		28	169	0.142132					82	294	0.218085
	c5	101	185	0.353147	0.558152			m5	18	425	0.0406321	0.0442166
		145	45	0.763158					25	498	0.0478011
	c6	66	160	0.292035	0.355168			m6	41	204	0.167347	0.180165
		128	178	0.418301					55	230	0.192982
Table Analyzed	GP
Column B	Col2Cre; Adgrg6
vs.	vs.
Column A	Control
Unpaired t test
P value	0.018
P value summary	*
Significantly different (P < 0.05)?	Yes
One- or two-tailed P value?	Two-tailed
t, df	t=2.825, df=10
How big is the difference?
Mean of column A	42.9
Mean of column B	16.18
Difference between means (B - A) ± SEM	-26.72 ± 9.460
95% confidence interval	-47.80 to -5.646
R squared (eta squared)	0.4438
F test to compare variances
F, DFn, Dfd	5.832, 5, 5
P value	0.0755
P value summary	ns
Significantly different (P < 0.05)?	No
Data analyzed
Sample size, column A	6
Sample size, column B	6
