# Supplementary material for: An adhesion G protein-coupled receptor is required in cartilaginous and dense connective tissues to maintain spine alignment
Source: eLife. 2021 Jul 28;10:e67781. doi: 10.7554/eLife.67781 (PMC8328515; doi:10.7554/eLife.67781)
Supplement: Figure 4—source data 1. [file elife-67781-fig4-data1.xlsx]

## Sheet: Fig. 3C
		pCREB IHC P20
		Control							Col2a1Cre; Adgrg6f/f
		pCREB +	pCREB -	pCREB+%	ave				pCREB +	pCREB -	pCREB+%	ave
AF	c1	38	252	0.131034	0.147548		curved	m1	3	232	0.012766	0.0182877
		42	214	0.164062					4	164	0.0238095
	c2	12	111	0.097561	0.130812			m2	10	251	0.0383142	0.0344632
		21	107	0.164062					6	190	0.0306122
	c3	52	245	0.175084	0.124127			m3	4	146	0.0266667	0.0231373
		24	304	0.0731707					3	150	0.0196078
	c4	58	145	0.285714	0.283044		not curved	m4	42	295	0.124629	0.0980288
		60	154	0.280374					27	351	0.0714286
	c5	21	121	0.147887	0.174302			m5	17	332	0.0487106	0.0355374
		56	223	0.200717					7	306	0.0223642
	c6	100	142	0.413223	0.342326			m6	50	201	0.199203	0.172955
		76	204	0.271429					49	285	0.146707
Table Analyzed	AF
Column B	Col2Cre; Adgrg6
vs.	vs.
Column A	Control
Unpaired t test
P value	0.0119
P value summary	*
Significantly different (P < 0.05)?	Yes
One- or two-tailed P value?	Two-tailed
t, df	t=3.066, df=10
How big is the difference?
Mean of column A	20.04
Mean of column B	6.373
Difference between means (B - A) ± SEM	-13.66 ± 4.456
95% confidence interval	-23.59 to -3.733
R squared (eta squared)	0.4845
F test to compare variances
F, DFn, Dfd	2.226, 5, 5
P value	0.4005
P value summary	ns
Significantly different (P < 0.05)?	No
Data analyzed
Sample size, column A	6
Sample size, column B	6
		pCREB +	pCREB -	pCREB+%	ave				pCREB +	pCREB -	pCREB+%	ave
NP	c1	44	152	0.22449	0.303974		curved	m1	3	96	0.030303	0.0394234
		51	82	0.383459					5	98	0.0485437
	c2	44	179	0.197309	0.195877			m2	5	96	0.049505	0.0599087
		28	116	0.194444					9	119	0.0703125
	c3	123	143	0.462406	0.471282			m3	18	120	0.130435	0.125368
		121	131	0.480159					16	117	0.120301
	c4	25	94	0.210084	0.467542		not curved	m4	39	113	0.256579	0.158593
		116	44	0.725					12	186	0.0606061
	c5	60	131	0.314136	0.253341			m5	2	185	0.0106952	0.00534759
		31	130	0.192547					0	103	0
	c6	49	155	0.240196	0.25877			m6	47	254	0.156146	0.170526
		71	185	0.277344					49	216	0.184906
	two-tailed t-test	c vs all			0.00182031
		c vs curved			0.0102655
		c vs not curved			0.0290585
Table Analyzed	NP
Column B	Col2Cre; Adgrg6
vs.	vs.
Column A	Control
Unpaired t test
P value	0.0018
P value summary	**
Significantly different (P < 0.05)?	Yes
One- or two-tailed P value?	Two-tailed
t, df	t=4.203, df=10
How big is the difference?
Mean of column A	32.51
Mean of column B	9.319
Difference between means (B - A) ± SEM	-23.19 ± 5.518
95% confidence interval	-35.49 to -10.90
R squared (eta squared)	0.6385
F test to compare variances
F, DFn, Dfd	2.971, 5, 5
P value	0.2572
P value summary	ns
Significantly different (P < 0.05)?	No
Data analyzed
Sample size, column A	6
Sample size, column B	6
		pCREB +	pCREB -	pCREB+%	ave				pCREB +	pCREB -	pCREB+%	ave
EP	c1	58	203	0.222222	0.264726		curved	m1	2	225	0.00881057	0.011162
		102	230	0.307229					3	219	0.0135135
	c2	123	111	0.525641	0.475381			m2	11	197	0.0528846	0.0526769
		88	119	0.425121					17	307	0.0524691
	c3	207	200	0.5086	0.47748			m3	30	257	0.10453	0.130436
		233	289	0.44636					53	286	0.156342
	c4	91	90	0.502762	0.523311		not curved	m4	118	290	0.289216	0.244948
		93	78	0.54386					59	235	0.20068
	c5	91	246	0.27003	0.189401			m5	36	366	0.0895522	0.0705493
		31	254	0.108772					20	368	0.0515464
	c6	99	113	0.466981	0.401954			m6	129	431	0.230357	0.218627
		125	246	0.336927					78	299	0.206897
	two-tailed t-test	c vs all			0.00246199
		c vs curved			0.00582516
		c vs not curved			0.0463741
Table Analyzed	EP
Column B	Col2Cre; Adgrg6
vs.	vs.
Column A	Control
Unpaired t test
P value	0.0025
P value summary	**
Significantly different (P < 0.05)?	Yes
One- or two-tailed P value?	Two-tailed
t, df	t=4.014, df=10
How big is the difference?
Mean of column A	38.87
Mean of column B	12.14
Difference between means (B - A) ± SEM	-26.73 ± 6.659
95% confidence interval	-41.57 to -11.89
R squared (eta squared)	0.617
F test to compare variances
F, DFn, Dfd	2.006, 5, 5
P value	0.4632
P value summary	ns
Significantly different (P < 0.05)?	No
Data analyzed
Sample size, column A	6
Sample size, column B	6
		pCREB +	pCREB -	pCREB+%	ave				pCREB +	pCREB -	pCREB+%	ave
GP	c1	43	232	0.156364	0.132322		curved	m1	9	241	0.036	0.0245217
		34	280	0.10828					3	227	0.0130435
	c2	39	300	0.115044	0.185601			m2	24	336	0.0666667	0.0607485
		52	151	0.256158					21	362	0.0548303
	c3	45	535	0.0775862	0.141252			m3	19	302	0.05919	0.0604169
		75	291	0.204918					18	274	0.0616438
	c4	30	110	0.214286	0.217379		not curved	m4	15	665	0.0220588	0.0220277
		28	99	0.220472					13	578	0.0219966
	c5	17	340	0.047619	0.0640394			m5	3	450	0.00662252	0.00539459
		42	480	0.0804598					2	478	0.00416667
	c6	60	209	0.223048	0.215613			m6	26	588	0.0423453	0.0463123
		56	213	0.208178					45	850	0.0502793
	two-tailed t-test	c vs all			0.000765119
		c vs curved			0.0180533
		c vs not curved			0.007289
Table Analyzed	GP
Column B	Col2Cre; Adgrg6
vs.	vs.
Column A	Control
Unpaired t test
P value	0.0008
P value summary	***
Significantly different (P < 0.05)?	Yes
One- or two-tailed P value?	Two-tailed
t, df	t=4.763, df=10
How big is the difference?
Mean of column A	15.94
Mean of column B	3.657
Difference between means (B - A) ± SEM	-12.28 ± 2.578
95% confidence interval	-18.02 to -6.535
R squared (eta squared)	0.6941
F test to compare variances
F, DFn, Dfd	6.739, 5, 5
P value	0.0564
P value summary	ns
Significantly different (P < 0.05)?	No
Data analyzed
Sample size, column A	6
Sample size, column B	6
		pCREB +	pCREB -	pCREB+%	ave				pCREB +	pCREB -	pCREB+%	ave
PO	c1	24	149	0.138728	0.243607		curved	m1	2	125	0.015748	0.045468
		23	43	0.348485					10	123	0.075188
	c2	41	71	0.366071	0.363036			m2	7	124	0.0534351	0.0396486
		45	80	0.36					6	226	0.0258621
	c3	33	119	0.217105	0.169777			m3	1	64	0.0153846	0.0228438
		18	129	0.122449					3	96	0.030303
	c4	22	48	0.314286	0.271897		not curved	m4	9	104	0.079646	0.0743759
		28	94	0.229508					17	229	0.0691057
	c5	44	108	0.289474	0.27618			m5	18	257	0.0654545	0.0527273
		51	143	0.262887					7	168	0.04
	c6	70	101	0.409357	0.361305			m6	16	166	0.0879121	0.134865
		26	57	0.313253					34	153	0.181818
	two-tailed t-test	c vs all			7.5444e-05
		c vs curved			0.000864731
		c vs not curved			0.00436727
Table Analyzed	PO
Column B	Col2Cre; Adgrg6
vs.	vs.
Column A	Control
Unpaired t test
P value	<0.0001
P value summary	****
Significantly different (P < 0.05)?	Yes
One- or two-tailed P value?	Two-tailed
t, df	t=6.429, df=10
How big is the difference?
Mean of column A	28.1
Mean of column B	6.165
Difference between means (B - A) ± SEM	-21.93 ± 3.411
95% confidence interval	-29.53 to -14.33
R squared (eta squared)	0.8052
F test to compare variances
F, DFn, Dfd	3.445, 5, 5
P value	0.2008
P value summary	ns
Significantly different (P < 0.05)?	No
Data analyzed
Sample size, column A	6
Sample size, column B	6

## Sheet: Fig. 3E
	quantificatio of WB
	FSK(uM)	0					10					20
	ATDC5 WT	0.953975	1.14362	1.26003	0.981409	0.592398	1.08523	1.85605	1.73315	1.1587	1.96843	1.84168	1.75277	1.26579	1.28253	1.9046
	Adgrg6 KO	0.286358	0.293714	0.512109	0.385271	0.304617	0.952168	0.870159	0.489923	0.535114	0.888802	1.15325	0.988061	0.747554	0.766864	0.899974
Table Analyzed	pCREB
Two-way ANOVA	Ordinary
Alpha	0.05
Source of Variation	% of total variation	P value	P value summary	Significant?
Interaction	0.5725	0.7352	ns	No
genotype	51.05	<0.0001	****	Yes
FSK	26.32	<0.0001	****	Yes
ANOVA table	SS	DF	MS	F (DFn, DFd)	P value
Interaction	0.04285	2	0.02142	F (2, 24) = 0.3115	P=0.7352
genotype	3.821	1	3.821	F (1, 24) = 55.56	P<0.0001
FSK	1.97	2	0.9849	F (2, 24) = 14.32	P<0.0001
Residual	1.651	24	0.06877
Difference between row means
Mean of ATDC5 WT	1.385
Mean of Adgrg6 KO	0.6716
Difference between means	0.7138
SE of difference	0.09576
95% CI of difference	0.5161 to 0.9114
Data summary
Number of columns (FSK)	3
Number of rows (genotype)	2
Number of values	30
Compare cell means regardless of rows and columns
Number of families	1
Number of comparisons per family	15
Alpha	0.05
Tukey's multiple comparisons test	Mean Diff.	95.00% CI of diff.	Significant?	Summary	Adjusted P Value
ATDC5 WT:0 vs. ATDC5 WT:10	-0.574	-1.087 to -0.06120	Yes	*	0.022
ATDC5 WT:0 vs. ATDC5 WT:20	-0.6232	-1.136 to -0.1104	Yes	*	0.0111
ATDC5 WT:0 vs. Adgrg6 KO:0	0.6299	0.1171 to 1.143	Yes	*	0.01
ATDC5 WT:0 vs. Adgrg6 KO:10	0.2391	-0.2738 to 0.7519	No	ns	0.7026
ATDC5 WT:0 vs. Adgrg6 KO:20	0.07515	-0.4377 to 0.5880	No	ns	0.9973
ATDC5 WT:10 vs. ATDC5 WT:20	-0.04916	-0.5620 to 0.4637	No	ns	0.9996
ATDC5 WT:10 vs. Adgrg6 KO:0	1.204	0.6911 to 1.717	Yes	****	<0.0001
ATDC5 WT:10 vs. Adgrg6 KO:10	0.8131	0.3003 to 1.326	Yes	***	0.0007
ATDC5 WT:10 vs. Adgrg6 KO:20	0.6492	0.1363 to 1.162	Yes	**	0.0076
ATDC5 WT:20 vs. Adgrg6 KO:0	1.253	0.7402 to 1.766	Yes	****	<0.0001
ATDC5 WT:20 vs. Adgrg6 KO:10	0.8622	0.3494 to 1.375	Yes	***	0.0003
ATDC5 WT:20 vs. Adgrg6 KO:20	0.6983	0.1855 to 1.211	Yes	**	0.0037
Adgrg6 KO:0 vs. Adgrg6 KO:10	-0.3908	-0.9036 to 0.1220	No	ns	0.2113
Adgrg6 KO:0 vs. Adgrg6 KO:20	-0.5547	-1.068 to -0.04190	Yes	*	0.0287
Adgrg6 KO:10 vs. Adgrg6 KO:20	-0.1639	-0.6767 to 0.3489	No	ns	0.9172
Test details	Mean 1	Mean 2	Mean Diff.	SE of diff.	N1	N2
ATDC5 WT:0 vs. ATDC5 WT:10	0.9863	1.56	-0.574	0.1659	5	5
ATDC5 WT:0 vs. ATDC5 WT:20	0.9863	1.609	-0.6232	0.1659	5	5
ATDC5 WT:0 vs. Adgrg6 KO:0	0.9863	0.3564	0.6299	0.1659	5	5
ATDC5 WT:0 vs. Adgrg6 KO:10	0.9863	0.7472	0.2391	0.1659	5	5
ATDC5 WT:0 vs. Adgrg6 KO:20	0.9863	0.9111	0.07515	0.1659	5	5
ATDC5 WT:10 vs. ATDC5 WT:20	1.56	1.609	-0.04916	0.1659	5	5
ATDC5 WT:10 vs. Adgrg6 KO:0	1.56	0.3564	1.204	0.1659	5	5
ATDC5 WT:10 vs. Adgrg6 KO:10	1.56	0.7472	0.8131	0.1659	5	5
ATDC5 WT:10 vs. Adgrg6 KO:20	1.56	0.9111	0.6492	0.1659	5	5
ATDC5 WT:20 vs. Adgrg6 KO:0	1.609	0.3564	1.253	0.1659	5	5
ATDC5 WT:20 vs. Adgrg6 KO:10	1.609	0.7472	0.8622	0.1659	5	5
ATDC5 WT:20 vs. Adgrg6 KO:20	1.609	0.9111	0.6983	0.1659	5	5
Adgrg6 KO:0 vs. Adgrg6 KO:10	0.3564	0.7472	-0.3908	0.1659	5	5
Adgrg6 KO:0 vs. Adgrg6 KO:20	0.3564	0.9111	-0.5547	0.1659	5	5
Adgrg6 KO:10 vs. Adgrg6 KO:20	0.7472	0.9111	-0.1639	0.1659	5	5

## Sheet: Fig. 3F
	Relative expressio of Col10a1/b-actin
		ATDC5 WT+ DMSO	ATDC5 WT+ FSK (2uM)	Adgrg6 KO+ DMSO	Adgrg6 KO+ FSK (2uM)
	1	0.00110409	0.00142508	0.00701492	0.000613
	2	0.00107173	0.00142166	0.00606112	0.001025
	3	0.00089293	0.00148602	0.00663438	0.001253
	Table Analyzed	Col10 FSK 2uM maturated day7
	Data sets analyzed	A-D
	ANOVA summary
	F	253.949
	P value	<0.0001
	P value summary	****
	Significant diff. among means (P < 0.05)?	Yes
	R squared	0.989608
	Brown-Forsythe test
	F (DFn, DFd)	1.59332 (3, 8)
	P value	0.2657
	P value summary	ns
	Are SDs significantly different (P < 0.05)?	No
	Bartlett's test
	Bartlett's statistic (corrected)
	P value
	P value summary
	Are SDs significantly different (P < 0.05)?
	ANOVA table	SS	DF	MS	F (DFn, DFd)	P value
	Treatment (between columns)	6.66667e-05	3	2.22222e-05	F (3, 8) = 253.949	P<0.0001
	Residual (within columns)	7.00053e-07	8	8.75066e-08
	Total	6.73667e-05	11
	Data summary
	Number of treatments (columns)	4
	Number of values (total)	12
	Number of families	1
	Number of comparisons per family	6
	Alpha	0.05
	Tukey's multiple comparisons test	Mean Diff.	95.00% CI of diff.	Below threshold?	Summary	Adjusted P Value
	WT+DMSO vs. WT+FSK	-0.000421339	-0.00119481 to 0.000352132	No	ns	0.3633	A-B
	WT+DMSO vs. Adgrg6 KO+DMSO	-0.00554722	-0.00632069 to -0.00477375	Yes	****	<0.0001	A-C
	WT+DMSO vs. Adgrg6 KO+FSK	5.90937e-05	-0.000714377 to 0.000832564	No	ns	0.9944	A-D
	WT+FSK vs. Adgrg6 KO+DMSO	-0.00512588	-0.00589935 to -0.00435241	Yes	****	<0.0001	B-C
	WT+FSK vs. Adgrg6 KO+FSK	0.000480432	-0.000293038 to 0.00125390	No	ns	0.2678	B-D
	Adgrg6 KO+DMSO vs. Adgrg6 KO+FSK	0.00560631	0.00483284 to 0.00637979	Yes	****	<0.0001	C-D
	Test details	Mean 1	Mean 2	Mean Diff.	SE of diff.	n1	n2	q	DF
	WT+DMSO vs. WT+FSK	0.00102292	0.00144426	-0.000421339	0.000241532	3	3	2.46701	8
	WT+DMSO vs. Adgrg6 KO+DMSO	0.00102292	0.00657014	-0.00554722	0.000241532	3	3	32.48	8
	WT+DMSO vs. Adgrg6 KO+FSK	0.00102292	0.000963825	5.90937e-05	0.000241532	3	3	0.346004	8
	WT+FSK vs. Adgrg6 KO+DMSO	0.00144426	0.00657014	-0.00512588	0.000241532	3	3	30.013	8
	WT+FSK vs. Adgrg6 KO+FSK	0.00144426	0.000963825	0.000480432	0.000241532	3	3	2.81302	8
	Adgrg6 KO+DMSO vs. Adgrg6 KO+FSK	0.00657014	0.000963825	0.00560631	0.000241532	3	3	32.826	8
