# Supplementary material for: An adhesion G protein-coupled receptor is required in cartilaginous and dense connective tissues to maintain spine alignment
Source: eLife. 2021 Jul 28;10:e67781. doi: 10.7554/eLife.67781 (PMC8328515; doi:10.7554/eLife.67781)
Supplement: Figure 5—source data 1. [file elife-67781-fig5-data1.xlsx]

## Sheet: Fig. 5D
	cobb angle	Cre- control
	age	P40	P120
		8.2	-7.4
		-6.9	-8.6
		0	7.5
		-3.2	7.7
			5.5
		-5.3	-8
		0	1.2
		-3.2	-4.1

## Sheet: Fig. 5E
	cobb angle	Bglap-Cre; Adgrg6f/f
	age	P40	P120
		7.6	2.7
		4.1	-4.7
		-8.1	0
		9.2	6.4
		6.7	NA
		3.8	-8.4
		0	-8.2
		7.2	0

## Sheet: Fig. 5G
		BV/TV
		Cre- Control	Bglap-Cre; Adgrg6f/f
		0.199826	0.287528
		0.221563	0.271144
		0.239857	0.249336
		0.282345	0.318933
	Table Analyzed	BV/TV
	Column B	Bglap-Cre; Adgrg6f/f
	vs.	vs.
	Column A	Cre- Control
	Unpaired t test
	P value	0.0915
	P value summary	ns
	Significantly different (P < 0.05)?	No
	One- or two-tailed P value?	Two-tailed
	t, df	t=2.007, df=6
	How big is the difference?
	Mean of column A	0.2359
	Mean of column B	0.2817
	Difference between means (B - A) ± SEM	0.04584 ± 0.02284
	95% confidence interval	-0.01004 to 0.1017
	R squared (eta squared)	0.4017
	F test to compare variances
	F, DFn, Dfd	1.427, 3, 3
	P value	0.7773
	P value summary	ns
	Significantly different (P < 0.05)?	No
	Data analyzed
	Sample size, column A	4
	Sample size, column B	4

## Sheet: Fig. 5K
		Col1a1/b-actin	Adgrg6/b-actin
	1	0.089008	2.76362e-05
	2	0.0903445	4.00853e-05
	3	0.0864849	3.44159e-05
	average expression	0.0886125	3.40458e-05
	SD	0.00195996	6.23278e-06
	relative expression	1	0.00038421
	SD	0.0221183	7.03375e-05

## Sheet: Fig. 5L
	Relative expression of Adgrg6/b-actin
		Cre- Control		Bglap-Cre; Adgrg6f/f
	1	3.03301e-05		8.46501e-06
	2	3.97741e-05		9.54755e-06
	3	3.50769e-05		9.507e-06
	average expression	3.50604e-05		9.17319e-06
	SD	4.72205e-06		6.13633e-07
	relative expression	1		0.26164
	SD	0.134684		0.0175022
	two-tailed t-test p=	0.00995739
		**
