# Supplementary material for: An adhesion G protein-coupled receptor is required in cartilaginous and dense connective tissues to maintain spine alignment
Source: eLife. 2021 Jul 28;10:e67781. doi: 10.7554/eLife.67781 (PMC8328515; doi:10.7554/eLife.67781)
Supplement: Figure 6—source data 1. [file elife-67781-fig6-data1.xlsx]

## Sheet: Fig. 6G
		cobb angle	Cre- control (Dox E0.5-P20)
		age	P20	P180
			3.8	-5.7
			-10.4	5.8
			4.1	0
			-7.8	0
			0.5	1.4
			-3.8	6
			0	5.2
			6.1	9.5
			-3.7	-5.6
			0	NA
			0	-8.5
			6.3	-6.5

## Sheet: Fig. 6H
		cobb angle	ATC-Adgrg6f/f (Dox E0.5-P20)
		age	P20	P180
			0	8.8
			4.4	9.3
			5.6	9.1
			3	NA
			-7.9	2
			-4.6	-7.9
			7.2	-9.8
			8	-7
			7	7.7
			-12.1	-26.3
			-6.7	-6.1
			4.4	0
			11.2	14.4
			20.9	NA
			0	NA
			43.2	NA

## Sheet: Fig. 6I
		cobb angle	Cre- control (Dox P1-P20)
		age	P20	P180
			2.2	-6.1
			0	-6.3
			-3.8	-5.7
			5.4	8.7
			0	-5.4
			-9.1	5.4
			7.6	-6.8
			-8.9	6.5

## Sheet: Fig. 6J
		cobb angle	ATC-Adgrg6f/f (Dox E0.5-P20)
		age	P20	P180
			-1.3	-1.8
			5.3	-8.1
			-4.4	5.2
			-7.5	-23.8
			0	6.8
			0	6.4
			-6.6	7.5
			6.9	-8.3
