# Supplementary material for: An adhesion G protein-coupled receptor is required in cartilaginous and dense connective tissues to maintain spine alignment
Source: eLife. 2021 Jul 28;10:e67781. doi: 10.7554/eLife.67781 (PMC8328515; doi:10.7554/eLife.67781)
Supplement: Figure 7—source data 1. [file elife-67781-fig7-data1.xlsx]

## Sheet: Fig. 7E
		cobb angle	Cre- control
		age	P40	P120
			2.3	-8.9
			-8.8	9.3
			-4.6	7.4
			3.1	8.2
			-5.2	-3.3
			-1.3	3
			1.6	-7.1
			5.1	8.7
			7.2	-6.9

## Sheet: Fig. 7F
		cobb angle	Scx-Adgrg6f/f
		age	P40	P120
			0	8.8
			4.4	9.3
			5.6	9.1
			3	NA
			-7.9	2
			-4.6	-7.9
			7.2	-9.8
			8	-7
			7	7.7
			-12.1	-26.3
			-6.7	-6.1
			4.4	0
			11.2	14.4
			20.9	NA
			0	NA
			43.2	NA

## Sheet: Fig. 7I
	Fascicle CSA (Individual fascicles)					Fascicle CSA (Average)
	Cre- control	Scx-Cre; Adgrg6f/f				Cre- control	Scx-Cre; Adgrg6f/f
	0.00874026	0.0124616				0.00910187	0.0137303
	0.00964525	0.017086				0.00848548	0.0142885
	0.00892009	0.0116434				0.00642183	0.011434
	0.0086211	0.00850969
	0.00637778	0.00992481
	0.0104576	0.0244311
	0.00657316	0.012515
	0.0062705	0.0120021
		0.009785
Number of values	8	9
Minimum	0.006271	0.00851
Maximum	0.01046	0.02443
Range	0.004187	0.01592
Mean	0.008201	0.01315
Std. Deviation	0.001597	0.00488
Std. Error of Mean	0.0005648	0.001627
Lower 95% CI of mean	0.006865	0.0094
Upper 95% CI of mean	0.009536	0.0169
	Table Analyzed	Fascicle CSA (Individual fascicles)				Table Analyzed	Fascicle CSA (Averages)
	Column B	Scx-Cre; Adgrg6f/f				Column B	Scx-Cre; Adgrg6f/f
	vs.	vs.				vs.	vs.
	Column A	Cre- control				Column A	ScxCre (-) Ctrl
	Mann Whitney test					Unpaired t test with Welch's correction
	P value	0.0037				P value	0.0126
	Exact or approximate P value?	Exact				P value summary	*
	P value summary	**				Significantly different (P < 0.05)?	Yes
	Significantly different (P < 0.05)?	Yes				One- or two-tailed P value?	Two-tailed
	One- or two-tailed P value?	Two-tailed				Welch-corrected t, df	t=4.321, df=3.978
	Sum of ranks in column A,B	43 , 110
	Mann-Whitney U	7				How big is the difference?
						Mean of column A	0.008003
	Difference between medians					Mean of column B	0.01315
	Median of column A	0.008681, n=8				Difference between means (B - A) ± SEM	0.005148 ± 0.001191
	Median of column B	0.01200, n=9				95% confidence interval	0.001832 to 0.008463
	Difference: Actual	0.003321				R squared (eta squared)	0.8243
	Difference: Hodges-Lehmann	0.003528
						F test to compare variances
						F, DFn, Dfd	1.162, 2, 2
						P value	0.9252
	Test for normal distribution					P value summary	ns
	Shapiro-Wilk test	Cre- control	Scx-Cre; Adgrg6f/f			Significantly different (P < 0.05)?	No
	W	0.8888	0.7983
	P value	0.2282	0.0195			Data analyzed
	Passed normality test (alpha=0.05)?	Yes	No			Sample size, column A	3
	P value summary	ns	*			Sample size, column B	3
	Number of values	8	9
						Test for normal distribution
						Shapiro-Wilk test	Cre- control	Scx-cKO
						W	0.9114	0.89
						P value	0.4228	0.3544
						Passed normality test (alpha=0.05)?	Yes	Yes
						P value summary	ns	ns
						Number of values	3	3

## Sheet: Fig. 7J
	Fascicle length at preload_ L0
		Cre- control	Scx-Cre; Adgrg6f/f
		21.0334	21.0552
		21.4864	20.849
		21.1902	20.9804
		21.0307	21.019
		21.3573	21.0466
		20.9941	21.5492
		20.9471	21.1676
		21.2437	21.1052
			21.1656
	Number of values	8	9
	Minimum	20.95	20.85
	Maximum	21.49	21.55
	Range	0.5394	0.7002
	Mean	21.16	21.1
	Std. Deviation	0.1924	0.1934
	Std. Error of Mean	0.06801	0.06447
	Lower 95% CI of mean	21	20.96
	Upper 95% CI of mean	21.32	21.25
Table Analyzed	Fascicle length at preload_ L0
Column B	Scx-Cre; Adgrg6f/f
vs.	vs.
Column A	Cre- control
Unpaired t test with Welch's correction
P value	0.5581
P value summary	ns
Significantly different (P < 0.05)?	No
One- or two-tailed P value?	Two-tailed
Welch-corrected t, df	t=0.5992, df=14.79
How big is the difference?
Mean of column A	21.16
Mean of column B	21.1
Difference between means (B - A) ± SEM	-0.05616 ± 0.09371
95% confidence interval	-0.2562 to 0.1438
R squared (eta squared)	0.02371
F test to compare variances
F, DFn, Dfd	1.011, 8, 7
P value
P value summary
Significantly different (P < 0.05)?	No
Data analyzed
Sample size, column A	8
Sample size, column B	9

## Sheet: Fig. 7K
E Modulus (Individual fascicles)					E Modulus (average)
Cre- control	Scx-Cre; Adgrg6f/f				Cre- control	Scx-Cre; Adgrg6f/f
1483.35	757.813				1145.13	682.187
1171.38	476.823				1055.26	776.922
702.329	716.166				921.161	1000.73
1106.4	1050.89
995.766	771.713
1176.13	522.768
863.36	1022.13
978.962	975.835
	1004.21
Table Analyzed	E Modulus (Individual fascicles)				Table Analyzed	E Modulus (averages)
Column B	Scx-Cre; Adgrg6f/f				Column B	Scx-Cre; Adgrg6f/f
vs.	vs.				vs.	vs.
Column A	Cre- control				Column A	Cre- control
Unpaired t test with Welch's correction					Unpaired t test with Welch's correction
P value	0.0395				P value	0.1358
P value summary	*				P value summary	ns
Significantly different (P < 0.05)?	Yes				Significantly different (P < 0.05)?	No
One- or two-tailed P value?	Two-tailed				One- or two-tailed P value?	Two-tailed
Welch-corrected t, df	t=2.264, df=14.40				Welch-corrected t, df	t=1.923, df=3.550
How big is the difference?					How big is the difference?
Mean of column A	1060				Mean of column A	1041
Mean of column B	810.9				Mean of column B	819.9
Difference between means (B - A) ± SEM	-248.8 ± 109.9				Difference between means (B - A) ± SEM	-220.6 ± 114.7
95% confidence interval	-483.8 to -13.74				95% confidence interval	-555.6 to 114.4
R squared (eta squared)	0.2626				R squared (eta squared)	0.5103
F test to compare variances					F test to compare variances
F, DFn, Dfd	1.173, 7, 8				F, DFn, Dfd	2.106, 2, 2
P value	0.8201				P value	0.6439
P value summary	ns				P value summary	ns
Significantly different (P < 0.05)?	No				Significantly different (P < 0.05)?	No
Data analyzed					Data analyzed
Sample size, column A	8				Sample size, column A	3
Sample size, column B	9				Sample size, column B	3
Test for normal distribution					Normality and Lognormality Tests of E Modulus (averages)
Shapiro-Wilk test	Cre- control	Scx-Cre; Adgrg6f/f				Cre- control	Scx-Cre; Adgrg6f/f
W	0.9722	0.8905			P value	0.7832	0.5611
P value	0.9145	0.2021			Passed normality test (alpha=0.05)?	Yes	Yes
Passed normality test (alpha=0.05)?	Yes	Yes			P value summary	ns	ns
P value summary	ns	ns
					Kolmogorov-Smirnov test
Number of values	8	9			KS distance	N too small	N too small
					P value
					Passed normality test (alpha=0.05)?
Descriptive statistics of E Modulus (Individual fascicles)	Cre- control	Scx-Cre; Adgrg6f/f			P value summary
Number of values	8	9
					Number of values	3	3
Minimum	702.3	476.8
Maximum	1483	1051
Range	781	574.1
Mean	1060	810.9
Std. Deviation	234.4	216.4
Std. Error of Mean	82.87	72.14
Identify outliers of E Modulus (Individual fascicles)	Cre- control	Scx-Cre; Adgrg6f/f
Method
ROUT (Q = 1%)
Number of points
# Y values analyzed	8	9
Outliers	0	0

## Sheet: Fig. 7L
	Failure force [N] (Individual fascicles)					Failure force [N] (average)
	Cre- control	Scx-Cre; Adgrg6f/f				Cre- control	Scx-Cre; Adgrg6f/f
	6.1921	4.8482				5.28413	4.80393
	6.2978	4.5401				5.17183	4.9508
	3.3625	5.0235				3.12175	6.21263
	5.7733	5.1532
	3.2436	3.8604
	6.4986	5.8388
	2.739	7.093
	3.5045	6.116
		5.4289
Number of values	8	9
Minimum	2.739	3.86
Maximum	6.499	7.093
Range	3.76	3.233
Mean	4.701	5.322
Std. Deviation	1.619	0.9444
Std. Error of Mean	0.5724	0.3148
Lower 95% CI of mean	3.348	4.597
Upper 95% CI of mean	6.055	6.048
	Table Analyzed	Failure force [N] (Individual fascicles)				Table Analyzed	Failure force [N] (Averages)
	Column B	Scx-Cre; Adgrg6f/f				Column B	Scx-Cre; Adgrg6f/f
	vs.	vs.				vs.	vs.
	Column A	Cre- control				Column A	Cre- control
	Unpaired t test with Welch's correction					Unpaired t test with Welch's correction
	P value	0.3622				P value	0.402
	P value summary	ns				P value summary	ns
	Significantly different (P < 0.05)?	No				Significantly different (P < 0.05)?	No
	One- or two-tailed P value?	Two-tailed				One- or two-tailed P value?	Two-tailed
	Welch-corrected t, df	t=0.9506, df=10.99				Welch-corrected t, df	t=0.9563, df=3.391
	How big is the difference?					How big is the difference?
	Mean of column A	4.701				Mean of column A	4.526
	Mean of column B	5.322				Mean of column B	5.322
	Difference between means (B - A) ± SEM	0.6210 ± 0.6533				Difference between means (B - A) ± SEM	0.7966 ± 0.8330
	95% confidence interval	-0.8170 to 2.059				95% confidence interval	-1.690 to 3.283
	R squared (eta squared)	0.07595				R squared (eta squared)	0.2124
	F test to compare variances					F test to compare variances
	F, DFn, Dfd	2.939, 7, 8				F, DFn, Dfd	2.471, 2, 2
	P value	0.1539				P value	0.5762
	P value summary	ns				P value summary	ns
	Significantly different (P < 0.05)?	No				Significantly different (P < 0.05)?	No
	Data analyzed					Data analyzed
	Sample size, column A	8				Sample size, column A	3
	Sample size, column B	9				Sample size, column B	3
	Test for normal distribution					Test for normal distribution
	Shapiro-Wilk test	Cre- control	Scx-Cre; Adgrg6f/f			Shapiro-Wilk test	Cre- control	Scx-Cre; Adgrg6f/f
	W	0.8138	0.9833			W	0.7888	0.8273
	P value	0.0402	0.9792			P value	0.0881	0.1814
	Passed normality test (alpha=0.05)?	No	Yes			Passed normality test (alpha=0.05)?	Yes	Yes
	P value summary	*	ns			P value summary	ns	ns
	Number of values	8	9			Number of values	3	3
	Identify outliers of Failure force [N] (Individual fascicles)					Identify outliers of Failure force [N] (Averages)
	Method	Cre- control	Scx-Cre; Adgrg6f/f			Method
	ROUT (Q = 1%)					ROUT (Q = 1%)
	Number of points					Number of points
	# Y values analyzed	8	9			# Y values analyzed	3	3
	Outliers	0	0			Outliers	0	0

## Sheet: Fig. 7M
	Failure strain [%] (Individual fascicles)						Failure strain [%] (average)
	Cre- control	Scx-Cre; Adgrg6f/f					Cre- control	Scx-Cre; Adgrg6f/f
	11.11	15.4384					13.922	14.6086
	15.8856	11.6519					15.2935	14.1656
	14.7704	16.7356					15.8735	15.5435
	16.0453	16.1423
	15.2112	16.4146
	14.6241	9.9399
	15.3638	15.0256
	17.2312	15.4637
		16.1411
Number of values	8	8
Minimum	11.11	11.65
Maximum	17.23	16.74
Range	6.121	5.084
Mean	15.03	15.38
Std. Deviation	1.787	1.608
Std. Error of Mean	0.6318	0.5686
Lower 95% CI of mean	13.54	14.03
Upper 95% CI of mean	16.52	16.72
	Table Analyzed	Failure strain [%] (Individual fascicles)					Table Analyzed	Failure strain [%] (averages)
	Column B	Scx-Cre; Adgrg6f/f					Column B	Scx-Cre; Adgrg6f/f
	vs.	vs.					vs.	vs.
	Column A	Cre- control					Column A	Cre- control
	Mann Whitney test						Mann Whitney test
	P value	0.3282					P value	>0.9999
	Exact or approximate P value?	Exact					Exact or approximate P value?	Exact
	P value summary	ns					P value summary	ns
	Significantly different (P < 0.05)?	No					Significantly different (P < 0.05)?	No
	One- or two-tailed P value?	Two-tailed					One- or two-tailed P value?	Two-tailed
	Sum of ranks in column A,B	58 , 78					Sum of ranks in column A,B	11 , 10
	Mann-Whitney U	22					Mann-Whitney U	4
	Difference between medians						Difference between medians
	Median of column A	15.29, n=8					Median of column A	15.29, n=3
	Median of column B	15.80, n=8					Median of column B	14.61, n=3
	Difference: Actual	0.5149					Difference: Actual	-0.6849
	Difference: Hodges-Lehmann	0.3854					Difference: Hodges-Lehmann	-0.3301
	Test for normal distribution						Test for normal distribution
	Shapiro-Wilk test	Cre- control	Scx-Cre; Adgrg6f/f				Shapiro-Wilk test	Cre- control	Scx-Cre; Adgrg6f/f
	W	0.8494	0.7468				W	0.948	0.9593
	P value	0.0939	0.0075				P value	0.5607	0.6118
	Passed normality test (alpha=0.05)?	Yes	No				Passed normality test (alpha=0.05)?	Yes	Yes
	P value summary	ns	**				P value summary	ns	ns
	Number of values	8	8				Number of values	3	3
	Identify outliers of Failure strain [%] (Individual fascicles)						Identify outliers of Failure strain [%] (average)
		Cre- control	Scx-Cre; Adgrg6f/f				Method
	ROUT (Q = 1%)						ROUT (Q = 1%)
	Number of points						Number of points
	# Y values analyzed	8	8				# Y values analyzed	3	3
	Outliers	0	0				Outliers	0	0

## Sheet: Fig. 7N
	Failure stress [N] (Individual fascicles)					Failure stress [N] (Averages)
	Cre- control	Scx-Cre; Adgrg6f/f				Cre- control	Scx-Cre; Adgrg6f/f
	70.8457	38.9051				57.9453	36.2073
	65.2943	26.5721				59.9892	41.1175
	37.6958	43.1448				51.4113	54.3719
	66.9671	60.5568
	50.8578	38.8965
	62.1426	23.899
	41.6694	56.6759
	55.8887	50.9579
		55.4818
Number of values	8	9
Minimum	37.7	23.9
Maximum	70.85	60.56
Range	33.15	36.66
Mean	56.42	43.9
Std. Deviation	12.13	13.11
Std. Error of Mean	4.289	4.371
Lower 95% CI of mean	46.28	33.82
Upper 95% CI of mean	66.56	53.98
	Table Analyzed	Failure stress [N] (Individual fascicles)				Table Analyzed	Failure stress [N] (Averages)
	Column B	Scx-Cre; Adgrg6f/f				Column B	Scx-Cre; Adgrg6f/f
	vs.	vs.				vs.	vs.
	Column A	Cre- control				Column A	Cre- control
	Unpaired t test with Welch's correction					Unpaired t test with Welch's correction
	P value	0.0589				P value	0.1323
	P value summary	ns				P value summary	ns
	Significantly different (P < 0.05)?	No				Significantly different (P < 0.05)?	No
	One- or two-tailed P value?	Two-tailed				One- or two-tailed P value?	Two-tailed
	Welch-corrected t, df	t=2.045, df=14.97				Welch-corrected t, df	t=2.088, df=2.865
	How big is the difference?					How big is the difference?
	Mean of column A	56.42				Mean of column A	56.45
	Mean of column B	43.9				Mean of column B	43.9
	Difference between means (B - A) ± SEM	-12.52 ± 6.124				Difference between means (B - A) ± SEM	-12.55 ± 6.010
	95% confidence interval	-25.58 to 0.5339				95% confidence interval	-32.20 to 7.098
	R squared (eta squared)	0.2184				R squared (eta squared)	0.6035
	F test to compare variances					F test to compare variances
	F, DFn, Dfd	1.168, 8, 7				F, DFn, Dfd	4.398, 2, 2
	P value	0.8505				P value	0.3705
	P value summary	ns				P value summary	ns
	Significantly different (P < 0.05)?	No				Significantly different (P < 0.05)?	No
	Data analyzed					Data analyzed
	Sample size, column A	8				Sample size, column A	3
	Sample size, column B	9				Sample size, column B	3
	Test for normal distribution					Test for normal distribution
	Shapiro-Wilk test	Cre- control	Scx-cKO			Anderson-Darling test	Cre- control	Scx-Cre; Adgrg6f/f
	W	0.9292	0.9304			A2*	N too small	N too small
	P value	0.509	0.4856			P value
	Passed normality test (alpha=0.05)?	Yes	Yes			Passed normality test (alpha=0.05)?
	P value summary	ns	ns			P value summary
	Number of values	8	9			D'Agostino & Pearson test
						K2	N too small	N too small
						P value
	Identify outliers of Failure stress [N] (Individual fascicles)					Passed normality test (alpha=0.05)?
	Method					P value summary
	ROUT (Q = 1%)	Cre- control	Scx-Cre; Adgrg6f/f
						Shapiro-Wilk test
	Number of points					W	0.9163	0.9343
	# Y values analyzed	8	9			P value	0.4395	0.5049
	Outliers	0	0			Passed normality test (alpha=0.05)?	Yes	Yes
						P value summary	ns	ns
						Kolmogorov-Smirnov test
						KS distance	N too small	N too small
						P value
						Passed normality test (alpha=0.05)?
						P value summary
						Number of values	3	3
